# Supplementary material for: Concanavalin A targetingN-linked glycans in spike proteins influence viral interactions
Source: Royal Society of Chemistry journal article supplement (doi:10.1039/d0dt02932g), 2020-01-01
Supplement: d0dt02932g1.pdf [file d0dt02932g1.pdf]

## Electronic Supplementary Information

### **Concanavalin A targeting *N*-linked glycans in spike proteins influence viral interactions**

Hara Jang,<sup>a</sup> Dong-Heon Lee,<sup>a</sup> Hyun Goo Kang,<sup>b</sup> and Seung Jae Lee<sup>\*ac</sup>

<sup>a</sup>Department of Chemistry, Jeonbuk National University, Jeonju 54896, Republic of Korea

<sup>b</sup>Department of Neurology and Biomedical Research Institute, Jeonbuk National University, Jeonju, 54896, Republic of Korea.

<sup>c</sup>Institute for Molecular Biology and Genetics, Jeonbuk National University, Jeonju 54896, Republic of Korea

\*Correspondence should be addressed to S.J.L. (slee026@jbnu.ac.kr).

Seung Jae Lee, Ph.D.

Associate Professor

Department of Chemistry and Institute for Molecular Biology and Genetics

Jeonbuk National University

Jeonju 54896, Rep. of Korea

Tel. +82-63-270-3412

Fax. +82-63-270-3407

## 1. Supplementary materials and methods

### 1.1. General methods

ConA isolated from *Canavalia ensiformis* (Jack bean) and soybean agglutinin isolated from *Glycine Max* were purchased from Sigma (St. Louis, USA, C2010 and L1395, respectively). 2-Aminobenzamide-labeled oligomannose oligosaccharide with 9-mannosyl residues (Ludger, 2AB-labeled Man<sub>9</sub>GlcNAc<sub>2</sub>, CAB-MAN9-01) and 2-aminobenzamide-labeled triantennary trigalactosylated oligosaccharide (Ludger, 2AB-labeled A<sub>3</sub>G<sub>3</sub>, CAB-NA3-01) were purchased for the fluorescence anisotropy experiment. 2AB-labeled Man<sub>9</sub>GlcNAc<sub>2</sub> (Man<sub>9</sub>-2AB, C<sub>77</sub>H<sub>126</sub>N<sub>4</sub>O<sub>56</sub>, 2,003.82 g/mol) has  $\alpha$ -D-mannoses as its terminal carbohydrates. 2AB-labeled A<sub>3</sub>G<sub>3</sub> (A<sub>3</sub>G<sub>3</sub>-2AB, C<sub>83</sub>H<sub>135</sub>N<sub>7</sub>O<sub>56</sub>, 2,126.97 g/mol) has  $\beta$ -D-galactoses as its terminal carbohydrates. ConA and SBA have molecular weights of 25,598.47 and 27,571.93 Da, respectively.

### 1.2. Measurements of fluorescence anisotropy between *N*-glycans-2AB and lectins

*N*-glycans (Man<sub>9</sub>-2AB or A<sub>3</sub>G<sub>3</sub>-2AB) binding to lectins (ConA or SBA) were observed by fluorescence anisotropy (FA). Measurements were taken with FP-8300 (JASCO) with a 2/3 type cuvette (JASCO, material Q (10 X 10 mm)) with Tris (hydroxyl methyl) amino methane (Sigma) and sodium chloride (Aldrich). Full excitation and emission spectra were measured initially to determine optimal wavelengths with 2.0 nM *N*-glycans-2AB. The excitation and emission wavelengths were 337 and 433 nm in both Man<sub>9</sub>-2AB and A<sub>3</sub>G<sub>3</sub>-2AB, respectively, with a 5-nm band width. The voltage of the photomultiplier tube (PMT) was fixed at 700 V, and all

experiments were performed at 25°C. Man<sub>9</sub>-2AB or A<sub>3</sub>G<sub>3</sub>-2AB (2.0 nM) in 20 mM Tris-HCl and 50 mM NaCl at pH 7.4 was titrated with ConA or SBA to the saturation point. All experiments were performed at least three times to achieve averages with standard deviations (average  $\pm$  s.d.).

Anisotropy ( $r$ ) was measured by the following equation:

$$r = \frac{(I_{\parallel} - I_{\perp})}{(I_{\parallel} + 2I_{\perp})}$$

$I_{\parallel}$  is the fluorescence intensity from parallel mode, and  $I_{\perp}$  is the fluorescence intensity from perpendicular mode. The results of anisotropy ( $r$ ) were changed to fraction bound ( $F_{bound}$ , fraction bound of Man<sub>9</sub>-2AB or A<sub>3</sub>G<sub>3</sub>-2AB).

$$F_{bound} = \frac{r - r_{free}}{r_{bound} - r_{free}}$$

Where  $r_{free}$  is the anisotropy of *N*-glycans-2AB that do not interact with lectins and  $r_{bound}$  represents the fluorescence anisotropy of *N*-glycans-2AB that bind lectins. In every experiment,  $r_{bound}$  was plotted against the lectin concentration and fit to the 1:1 binding model.

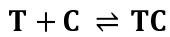

$$K_d = \frac{[T][C]}{[TC]}$$

$$F_{bound} = \frac{C_{total} + T_{total} + K_d - \sqrt{(C_{total} + T_{total} + K_d)^2 - 4C_{total}T_{total}}}{2T_{total}}$$

Where C is the concentration of ConA or SBA and T is the concentration of Man<sub>9</sub>-2AB or A<sub>3</sub>G<sub>3</sub>-2AB.  $K_d$  represents the dissociation constant.  $K_d$  was calculated by Origin (2018b version) and Wolfram Mathematica.

### **1.3. Preparation of apo-concanavalin A**

Mn<sup>2+</sup>-Ca<sup>2+</sup>-ConA (250  $\mu$ M, 3 mL, hereafter ConA) in 20 mM Tris-HCl (pH 7.4) and 50 mM NaCl was incubated with 2.0 M HCl (3.0 mL) for 50 min at room temperature. The mixture was transferred to a 10-kDa cut-off membrane filter (Merck) and rinsed at 3,000 rpm and 4°C three times with 2.0 M HCl in 20 mM Tris-HCl and 50 mM NaCl. This demetallization process was performed five times to form apo-ConA. The concentrations of metal ions including Mn<sup>2+</sup> and Ca<sup>2+</sup> were analyzed with an inductively coupled plasma-optical emission spectrometer (ICP-OES, Thermo Fisher Scientific, iCAP 7400 Duo Model) that was operated at the core facility center at Jeonbuk National University.

## Supplementary Figures

**Fig. S1** Three major types of *N*-linked glycans.

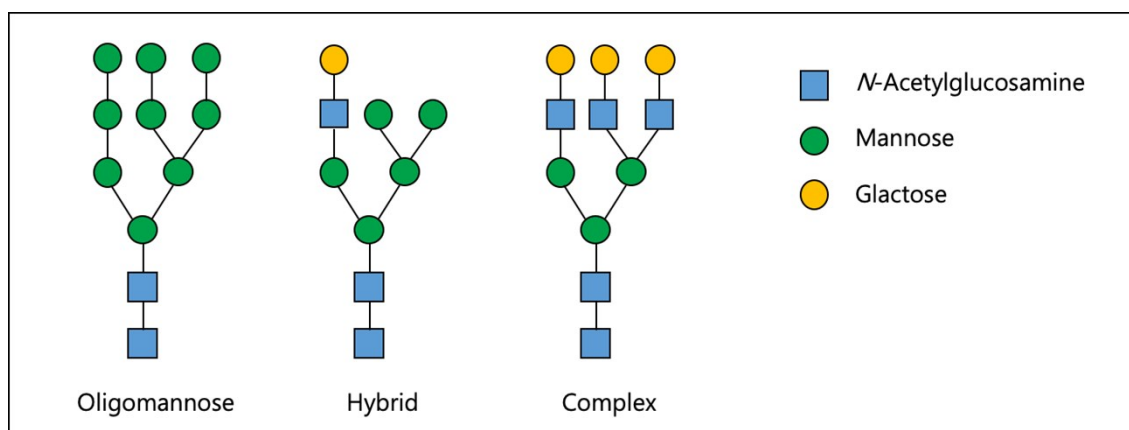

**Fig. S2** Structures of (a)  $\text{Man}_9\text{GlcNAc}_2$  and (b)  $\text{A}_3\text{G}_3$ .

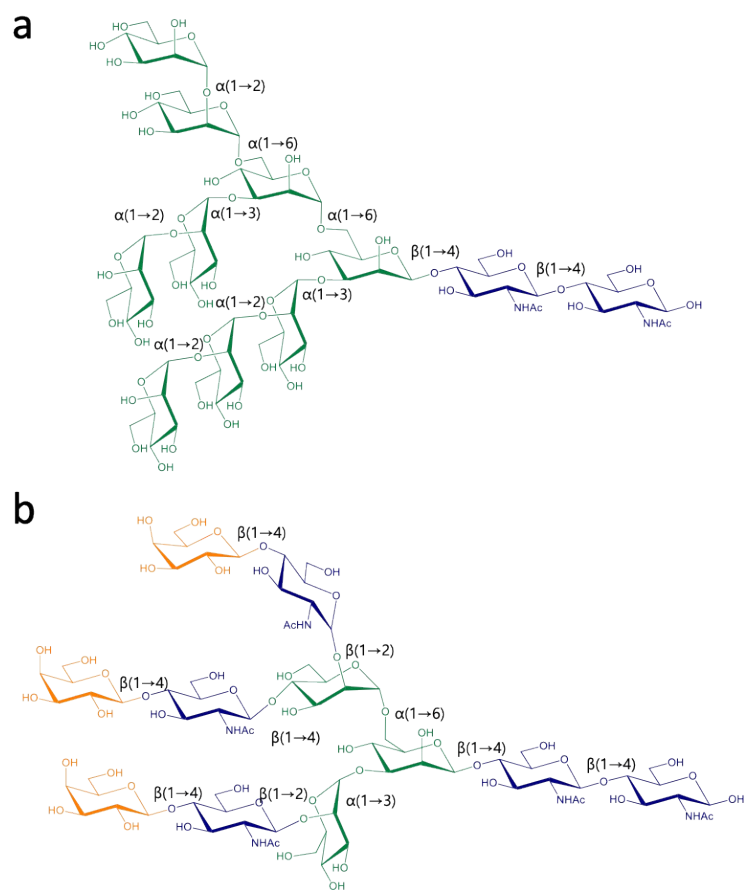

**Table S1.** Dissociation constants ( $K_{ds}$ ) between lectins and *N*-glycans labeled 2-aminobenzamide (2-AB) at pH 7.4.

|          | Man <sub>9</sub> GlcNAc <sub>2</sub> -2AB | A <sub>3</sub> G <sub>3</sub> -2AB |
|----------|-------------------------------------------|------------------------------------|
| ConA     | $0.63 \pm 0.03 \times 10^{-6}$            | $7.58 \pm 0.16 \times 10^{-6}$     |
| Apo-ConA | $24.69 \pm 1.20 \times 10^{-6}$           | $33.21 \pm 1.34 \times 10^{-6}$    |
| SBA      | $1.40 \pm 0.07 \times 10^{-6}$            | $0.78 \pm 0.03 \times 10^{-6}$     |

(Unit: M)
